# Supplementary material
Source: PubMed Central journal article supplement (PMC7541395)
Supplement: NIHMS1581997-supplement-1.pdf [file NIHMS1581997-supplement-1.pdf]

900 **Data Supplement**

901

902 **Table 6.** Patients available for follow-up during study period. Initial cohort was comprised of  
 903 696 patients who underwent CMP-IV. Patients available for follow-up include all patients  
 904 available at time of data collection (regardless of recurrence status) for each discrete timepoint.  
 905 The number of deceased patients refers to the cumulative mortality at each timepoint. Patients  
 906 not available for follow-up and not known to be deceased are displayed as censored.

| Year Follow-Up | Total Patients | Patients Available | Deceased Patients | Censored Patients |
|----------------|----------------|--------------------|-------------------|-------------------|
| 1              | 636            | 499                | 59                | 138               |
| 2              | 555            | 401                | 140               | 155               |
| 3              | 480            | 319                | 215               | 162               |
| 4              | 415            | 254                | 280               | 162               |
| 5              | 350            | 205                | 345               | 146               |

907

908 **Table 7.** Non-censored patients available for follow-up.

| Year Follow-Up | Non-censored Patients Available at Follow-up | Younger Cohort (Age < 75) | Elderly Cohort (Age ≥ 75) |
|----------------|----------------------------------------------|---------------------------|---------------------------|
| 1              | 499                                          | 406                       | 93                        |
| 2              | 401                                          | 326                       | 75                        |
| 3              | 319                                          | 265                       | 54                        |
| 4              | 254                                          | 209                       | 45                        |
| 5              | 205                                          | 169                       | 36                        |

909

910

911

912

913

914

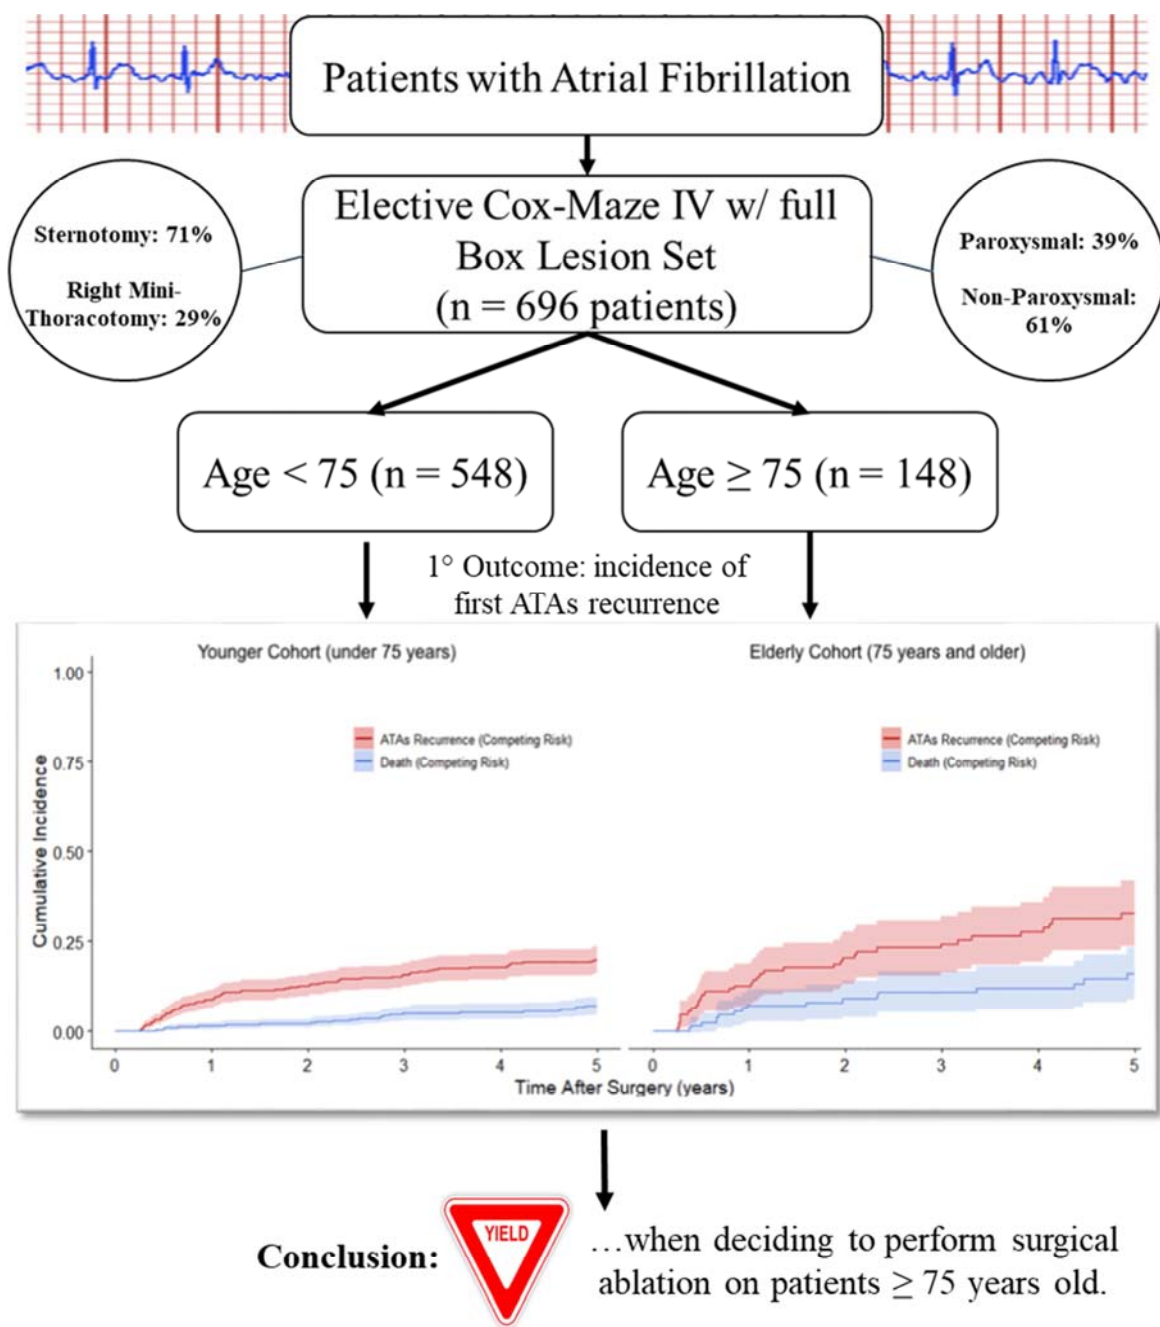

915  
 916  
 917  
 918  
 919  
 920  
 921  
 922  
 923  
 924

**Figure 5. Graphical Abstract.** Overview of study design including total number of study patients undergoing elective Cox-Maze IV procedure with full Box Lesion set for symptomatic atrial fibrillation (n = 696). Patients divided into two cohorts based on age at time of surgery: age < 75 years (n = 548) and age ≥ 75 years (n = 148). Primary outcome was incidence of first ATAs recurrence. By competing risk analysis, the incidence of first ATAs recurrence was higher in elderly patients. The lower success rate in elderly patients should be considered when deciding to perform surgical ablation.

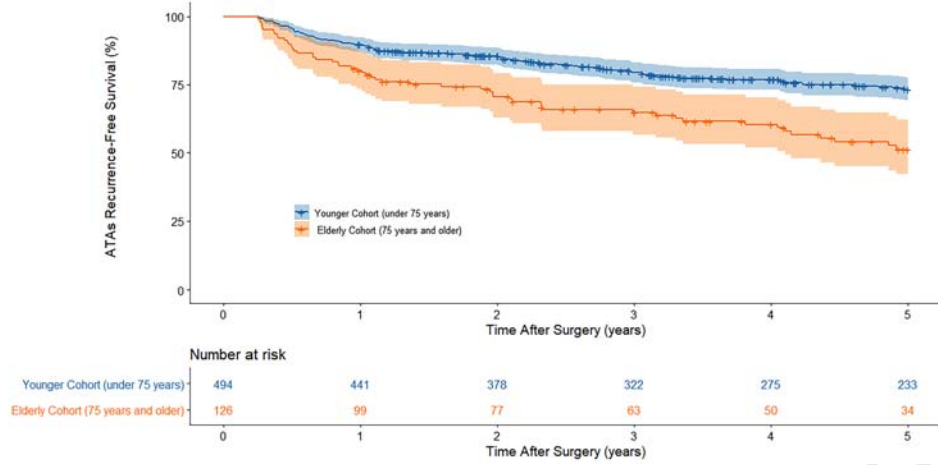

Journal Pre-proof

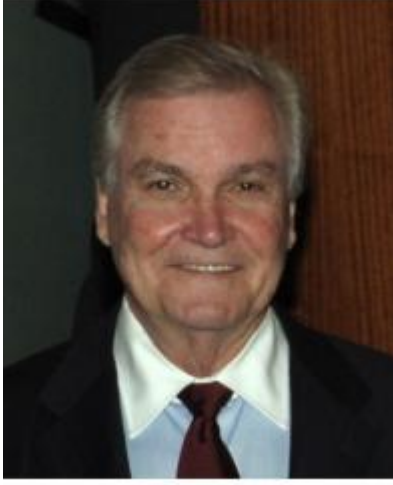

Journal Pre-proof

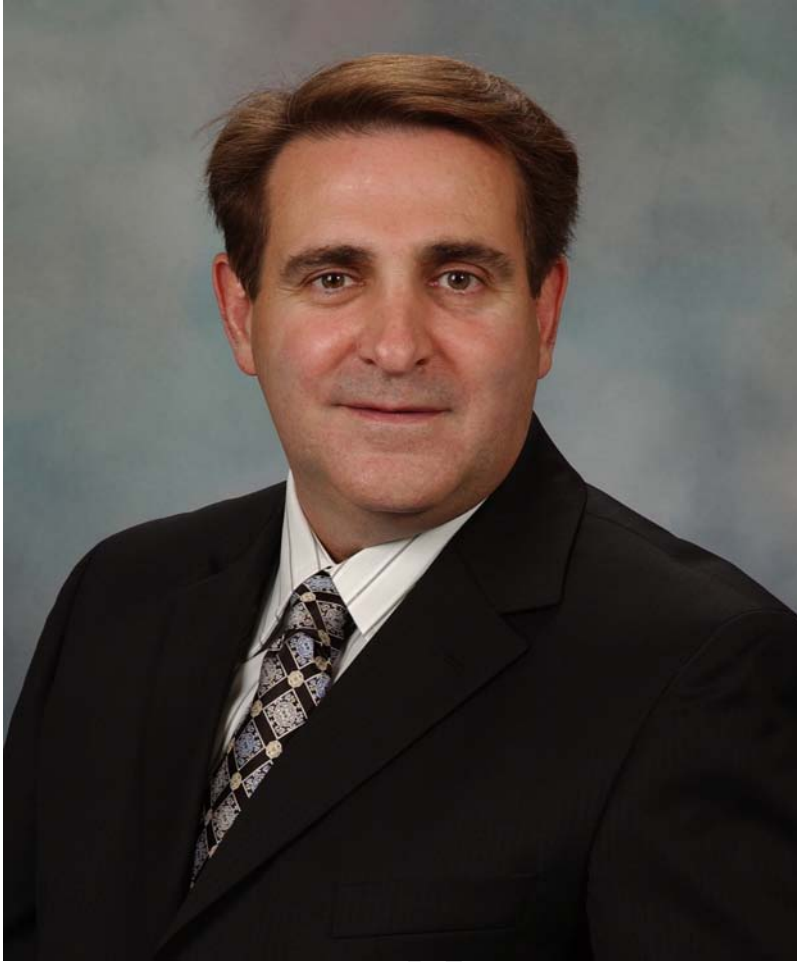

Journal Pre-proof

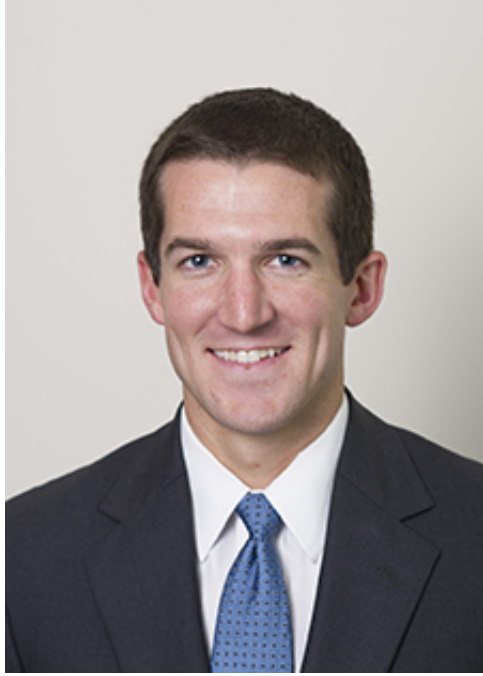

Journal Pre-proof

# Impact of Age on Atrial Fibrillation Recurrence Following Cox-Maze IV Procedure

Robert MacGregor, MD, Ali Khiabani, MD, Laurie Sinn, RN, BSN, Joshua Manghelli, DO, Daniel Carter, BS, Hersh Maniar, MD, Richard B Schuessler, PhD, Marc Moon, MD, Spencer Melby, MD, and Ralph Damiano Jr., MD

Division of Cardiothoracic Surgery, Department of Surgery  
Washington University School of Medicine and Barnes-Jewish Hospital  
St. Louis, Missouri, USA

May 4, 2019

 Washington University in St. Louis • School of Medicine

Department of Surgery  
Division of Cardiothoracic Surgery

Journal Pre
